# Supplementary material for: A novel method of solid state ninhydrin reaction and its application in the quantification of oil-soluble amine polymers
Source: Royal Society of Chemistry journal article supplement (doi:10.1039/d5ay00096c), 2025-01-01
Supplement: d5ay00096c1.pdf [file d5ay00096c1.pdf]

# Supporting Information

## **A novel method of solid state ninhydrin reaction and its application in the quantification of oil-soluble amine polymers**

*Ge Han, Jing Yang, Yajing Wei, Dan Liu, Qian Liu, Xinheng Cai, Qundan Zhang,  
Zhongpeng Zhu\*, Wei Wang\**

**1.SINOPEC Research Institute of Petroleum Processing Co., LTD.  
No. 18 Xueyuan Road, Haidian District, Beijing 100083, China**

**\*Corresponding Author: zhuzhongpeng.ripp@sinopec.com  
wangwei3.ripp@sinopec.com**

# Figure of Contents

**Figure S1. Thin-layer chromatographic analysis of aniline and three amino polymers with dichloromethane as the developing solvent. A: aniline, B: PEA, C: PIBA, D: Mannich**

**Figure S2. The UV-Vis spectra of PIBA reacting with ninhydrin at different concentrations**

**Figure S3. The mass spectrum of hexadecylamine and structural formulae of the feedstocks and intermediates of hexadecylamine.**

**Figure S4. Reaction mechanism of PIBA and ninhydrin**

**Figure S5. Reaction mechanism of PEA and ninhydrin**

**Figure S6. Reaction mechanism of Mannich and ninhydrin**

**Figure S7. The picture of the DMSO extract of PIBA**

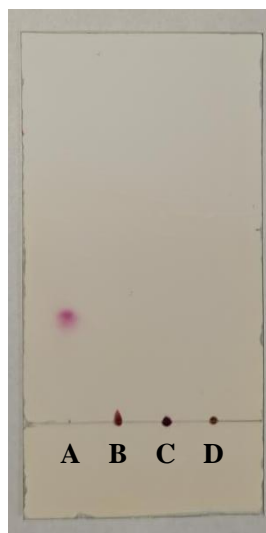

**Figure S1.** Thin-layer chromatographic analysis of aniline and three amino polymers with dichloromethane as the developing solvent. A: aniline, B: PEA, C: PIBA, D: Mannich.

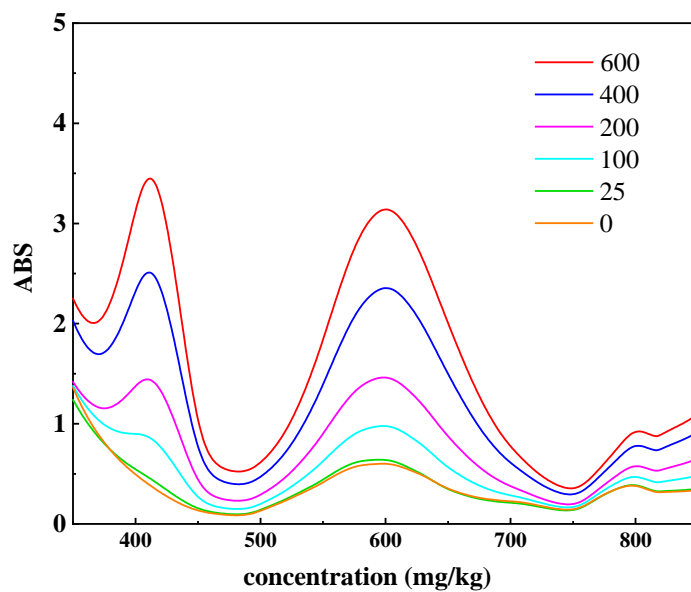

**Figure S2.** The UV-Vis spectra of PIBA reacting with ninhydrin at different concentrations.

(I) Hexadecylamine reacted with ninhydrin

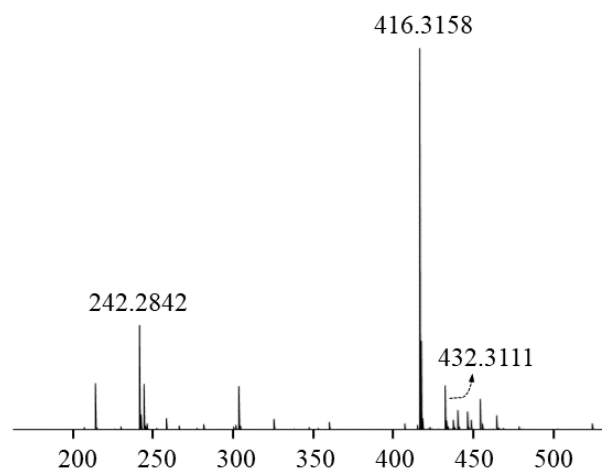

(II) Structural formula for feedstock (left) and intermediate (right)

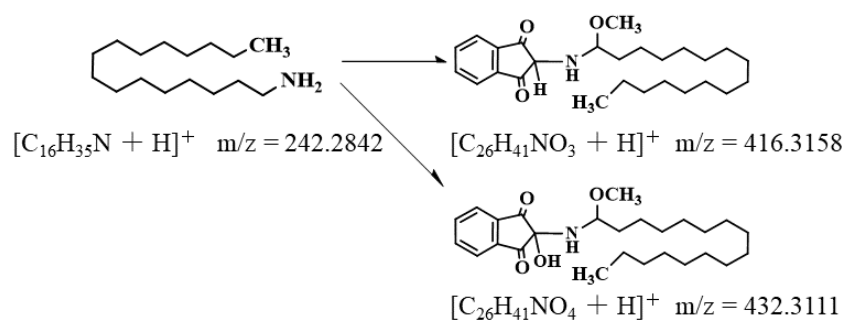

**Figure. S3. The mass spectrum of hexadecylamine and structural formulae of the feedstocks and intermediates of hexadecylamine.**

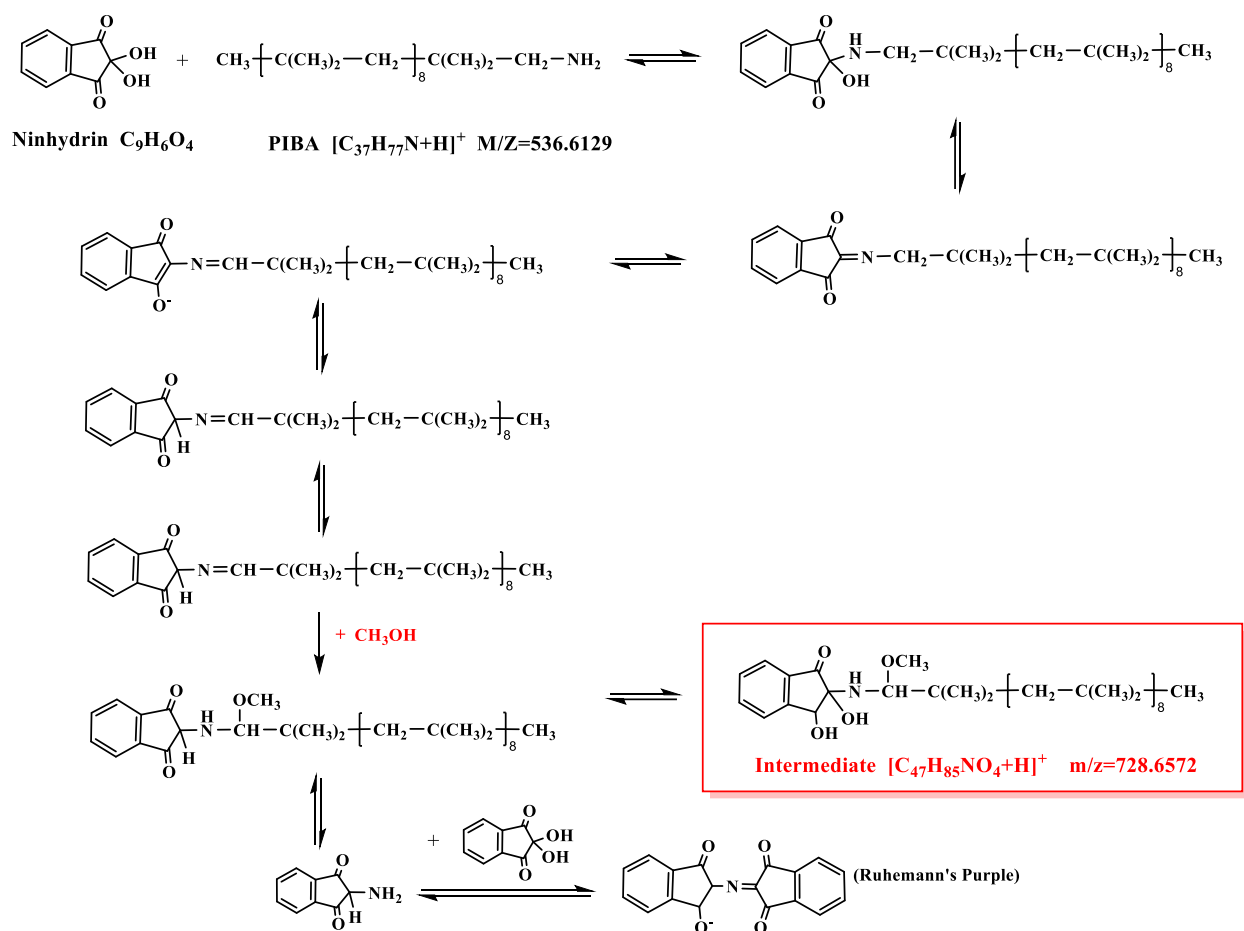

**Figure S4. Reaction mechanism of PIBA and ninhydrin**
